# Supplementary material
Source: PubMed Central journal article supplement (PMC5115167)
Supplement: jgv-97-680-s001.pdf [file jgv-97-680-s001.pdf]

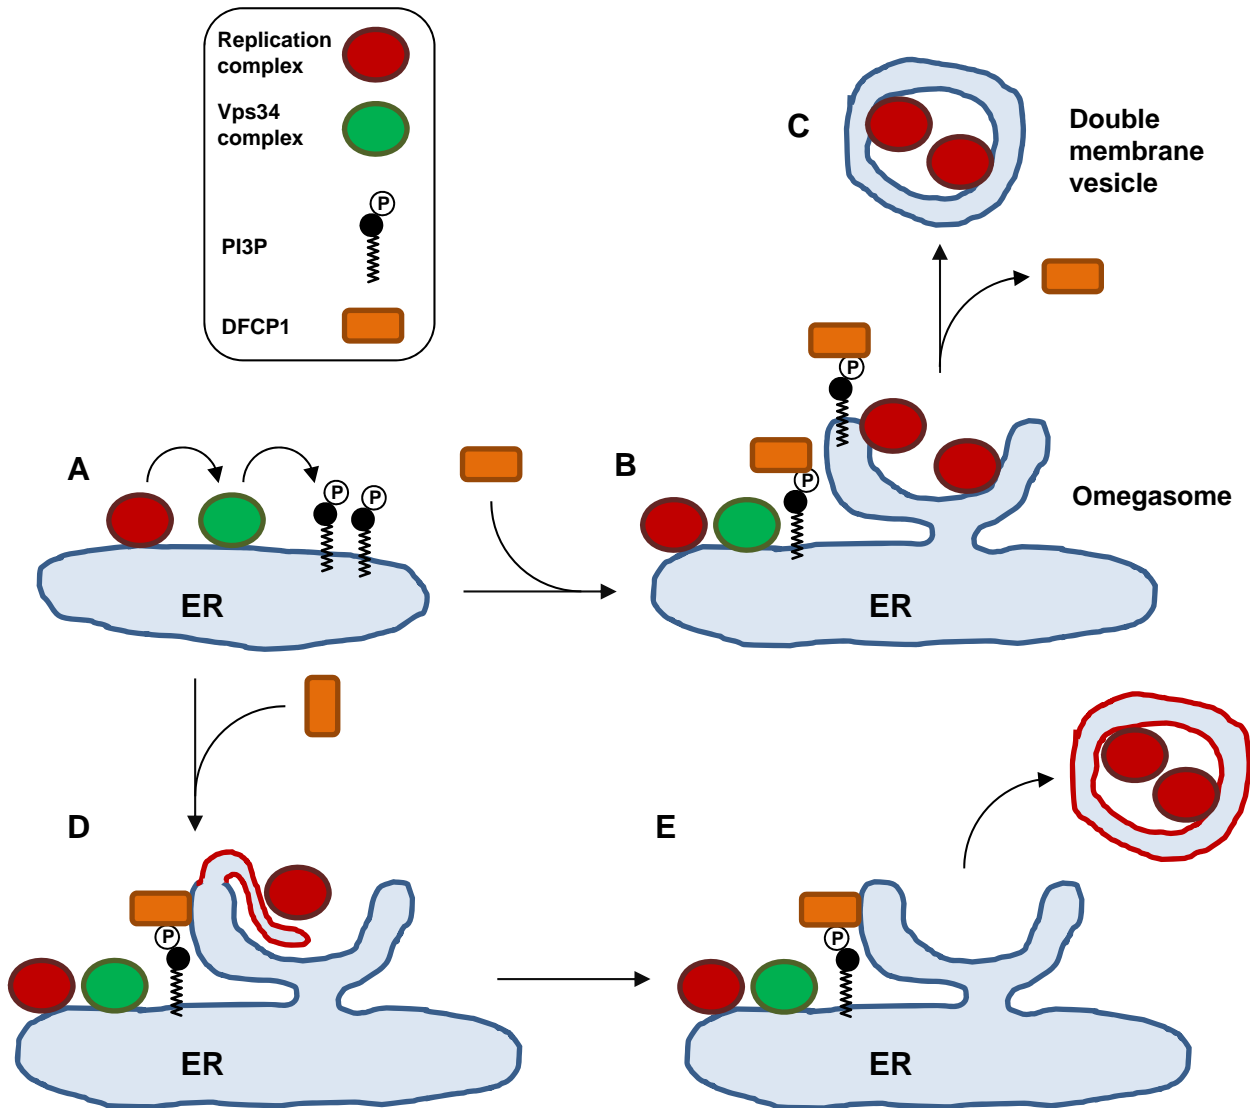

**Supplementary Figure S1. Models for the involvement of omegasome formation in the biogenesis of the HCV RNA replication factory.** (A) The replication complex, consisting of NS3-NS5B is located on the ER membrane and interacts with the Vps34 complex (consisting of Vps34 together with Vps15, Beclin1 and Atg14L). Vps34 PI3K activity generates a concentration of PI3P at the ER membrane. (B) This recruits DFCP1 (via its FYVE domain which interacts with PI3P, and DFCP-1 mediates the formation of cup like protrusions from the ER membrane, referred to as omegasomes). By an unknown mechanism replication complexes become sequestered within these structures. (C) Omegasomes pinch off from the ER membrane, forming double membrane vesicles containing the replication complexes, in the process DFCP1 is released back into the cytosol. In an alternative scenario (D), the isolation membrane (in red) forms by extension of the tip of the omegasome, ultimately forming an intact autophagosome which separates from the omegasome (E).
